# Supplementary material
Source: MDPI journal article supplement (https://www.mdpi.com/2072-4292/7/5/5256)
Supplement: s1 [file s1]

## Sheet: Wetlands in general 
Publication	Definition	Discussion of definitions?	Group figure 2	Group figure 4	Specific Wetland type?
Acreman, M.C.; Miller, F. Hydrological Impact assessment of wetlands. International Symposium on Groundwater Sustainability, 2006, Alicante (Spain).	none	N	no definition
Adam, E.; Mutanga, O.; Rugege, D. Multispectral and hyperspectral remote sensing for identification and mapping of wetland vegetation: a review. Wetlands Ecology and Management 2010, 18, 281-296.	none	N	no definition but delineation by surface properties (wetland vegetation)	DZ
Adam, P. Saltmarsh and mangrove. In Australian Vegetation, 2nd ed.; Groves, R.H., Ed.; Cambridge University Press, Cambridge, UK, 1994; pp. 395-346.	"Intertidal communities dominated by vascular plants"	N	distinct wetland definition	BZ	saltmarshes and mangroves
Adam, P. Wetlands and wetland boundaries: problems, expectations, perceptions and reality. Wetlands (Australia) 1992, 11, 60–67.	none	Y	no definition but discussion of definitions
Albert, E.K. An expert system for the classification of wetlands: The wetland advisor. International Journal of Surface Mining, Reclamation and Environment 1990, 4, 107-113.	US FWS (Cowardin_etal_1979): "lands transitional between terrestrial and aquatic systems where the water table is usually at or near the surface or the land is covered by shallow water"	N	US FWS definition
Anderson, J.E. Spectral Reflectance Properties of Wetland Plants; US Army Topographic Engineering Center: n./A.; n./A., 1994.	none	N	no definition but delineation by surface properties (plant stress signs)	DZ
Anderson, J.E.; Perry, J.E. Characterization of wetland plant stress using leaf spectral reflectance: Implications for wetland remote sensing. Wetlands 1996, 16, 477-487.	none	N	no definition but delineation by surface properties (plant stress signs)	DZ
Andriesse, J.P. Distribution of Tropical Peat. In Nature and Management of Tropical Peat Soils; FAO, Ed.; FAO: Rome, Italy, 1988. FAO Soils Bulletin, 59, n./A.	"Peats are generally considered to be partly decomposed biomass"	N	distinct wetland definition	AZ	peat
Aselmann, I.; Crutzen, P. J. Global distribution of natural freshwater wetlands and rice paddies, their net primary productivity, seasonality and possible methane emissions. Journal of Atmospheric Chemistry 1989, 8, 307–358.	none	N	no definition	EZ
Baranyai, A.; Benko, D. Wetlands - Ecology, Management and Conservation; Nova Science Publishers: New York, USA; 2012.	none	N	no definition
Batzer, D.P.; Sharitz, R.R. Ecology of Freshwater and Estuarine Wetlands; University of California Press: Berkeley and Los Angeles, USA, 2006.	none	Y	no definition but discussion of definitions
Brinson, M.M. A Hydrogeomorphic Classification for Wetlands; US Army Corps of Engineers: Washington DC, USA, 1993.	"those areas that are inundated or saturated at a frequency to support, and which normally do support, plants adapted to saturated and/or inundated conditions. They normally include swamps, bogs, marshes, and peatlands"	N	distinct wetland definition	BZ
Brock, M.A. Aquatic vegetation of inland wetlands. In Australian Vegetation; Groves, R.H., Ed.; Cambridge University Press, Cambridge, UK, 1994.	"Wetlands have seasonal or aseasonal (erratic) filling and drying patterns that eflect the rainfall patterns of the geographical region in which they occur" - Lakes, swamps, land subject to inundation, river and creek channels (permanent wetting, seasonal wetting, intermittent wetting, episodic wetting)"	N	distinct wetland definition	BZ
Bryant, E.A. Sea level change and greenhouse: Implications for wetlands. Wetlands (Australia) 1990, 10, 7-14.	none	N	no definition
Cao, M.; Gregson, K.; Marshall, S. Global methane emission from wetlands and its sensitivity to climate change. Atmospheric Environment 1998, 32(19), 3293-3299.	none	N	no definition
Carter, V. Applications of Remote Sensing to Wetlands. In Remote Sensing for Resource Mangement; Johanssen, Sanders, Eds.; Soil Conservation Society of America: Ankeny, USA, 1982.	US FWS (Cowardin_etal_1979): "lands transitional between terrestrial and aquatic systems where the water table is usually at or near the surface or the land is covered by shallow water"	N	US FWS definition	BZ
Carter, V.; Richardson, K.A. Landsat Digital Analysis: Implications for wetland management. in Proceedings on the 7th International Symposium - Machine Processing of Remotely Sensed Data with special emphasis on Range, Forest and Wetlands Assessment 1981, 220-229.	none	N	no definition
Coughanowr, C. Wetlands of the humid tropics. IHP humid tropics programme series 1998, 12, n./A.	Ramsar: “wetlands are areas of marsh, fen, peatland or water, whether natural or artificial, permanent of temporary, with water that is static or flowing, fresh, brackish or salt, including areas of marine water the depth of which at low tide does not exceed six metres."	N	Ramsar definition
Cowardin, L.M.; Carter, V.; Golet, F.C.; LaRoe, E.T. Classification of Wetlands and Deepwater Habitats of the United States; US Department of the Interior, Fish and Wildlife Service: Washington DC, USA, 1979.	US FWS (Cowardin_etal_1979): "Wetlands are lands transitional between terrestrial and aquatic systems where the water table is usually at or near the surface or the land is covered by shallow water. For the purposes of this classification wetlands must have one or more of the following three attributes: (I) at least periodically, the land supports predominantly hydrophytes; (2) the substrate is p…	N	US FWS definition
Cowardin, L.M.; Golet, F.C. US Fish and Wildlife Service 1979 wetland classification: A review. Vegetatio 1995, 118(1-2), 139-152.	US FWS (Cowardin_etal_1979): "Wetlands are lands transitional between terrestrial and aquatic systems where the water table is usually at or near the surface or the land is covered by shallow water. For the purposes of this classification wetlands must have one or more of the following three attributes: (I) at least periodically, the land supports predominantly hydrophytes; (2) the substrate is p…	N	US FWS definition
Darras, S.; Michou, M.; Sarrat, C. IGBP-DIS Wetland Data Initiative: A First Step Towards Identifying a Global Delineation of Wetlands; IGBP-DIS Office: n./A., n./A., 1999.	none	N	no definition
Davidson, N. C.; Finlayson, C. M. Earth Observation for wetland inventory, assessment and monitoring. Aquatic Conservation: Marine and Freshwater Ecosystems 2007, 17, 219–228.	none	N	Ramsar definition
Dugan, P. Wetlands in Danger - A World Conservation Atlas; Oxford University Press: New York, USA, 1993.	Ramsar: “wetlands are areas of marsh, fen, peatland or water, whether natural or artificial, permanent of temporary, with water that is static or flowing, fresh, brackish or salt, including areas of marine water the depth of which at low tide does not exceed 6 metres."	N	Ramsar definition
Finlayson, C.M. Considerations for undertaking a wetland inventory. N./A.: n./A., n./A., n./A.	none	Y	no definition but discussion of definitions
Finlayson, C.M.; Davidson, N.C.; Spiers, A.G.; Stevenson, N.J. Global wetland inventory – current status and future priorities. Marine and Freshwater Research 1999,50, 717-727.	Ramsar: “wetlands are areas of marsh, fen, peatland or water, whether natural or artificial, permanent of temporary, with water that is static or flowing, fresh, brackish or salt, including areas of marine water the depth of which at low tide does not exceed six metres."	N	Ramsar definition
Finlayson, C.M.; Davidson, N.C.; Stevenson, N.J. Wetland inventory, assessment and monitoring: Practical techniques and identification of major issues. Supervising Scientist Report 161. Supervising Scientist: Canberra, Australia, 2001.	Ramsar: “wetlands are areas of marsh, fen, peatland or water, whether natural or artificial, permanent of temporary, with water that is static or flowing, fresh, brackish or salt, including areas of marine water the depth of which at low tide does not exceed six metres."	N	Ramsar definition
Finlayson, C.M.; Spiers, N.C. (Eds.). Techniques for enhanced wetland inventory and monitoring. Supervising Scientist Report 147. Supervising Scientist: Canberra, Australia, 1999 (b).	Ramsar: “wetlands are areas of marsh, fen, peatland or water, whether natural or artificial, permanent of temporary, with water that is static or flowing, fresh, brackish or salt, including areas of marine water the depth of which at low tide does not exceed six metres."	N	Ramsar definition
Finlayson, C.M.; Spiers, N.C. Global review of wetland resources and priorities for wetland inventory. Supervising Scientist Report 144. Supervising Scientist: Canberra, Australia, 1999	Ramsar: “wetlands are areas of marsh, fen, peatland or water, whether natural or artificial, permanent of temporary, with water that is static or flowing, fresh, brackish or salt, including areas of marine water the depth of which at low tide does not exceed six metres."	N	Ramsar definition
Fraser, L.H.; Keddy, P.A. The World's Largest Wetlands: Ecology and Conservation; Cambridge University Press: Cambridge, UK, 2005.	"Wetlands are the fragile interface between land and water"	N	distinct wetland definition	BZ
Gore, A.J.P. Ecosystems of the world, 4b - Mires: swamp, bog, fen and moor; Elsevier: Amsterdam, Netherlands, 1983.	"The term mire includes all those ecosystems described in English usage by such words as swamp, bog, fen, moor, muskeg and peatland."	N	distinct wetland definition	AZ
Güntner, A.; Struck, J.; Werth, S.; Döll, P.; Verzano, K.; Merz, B. A global analysis of temporal and spatial variations in continental water storage. Water Resources Research 2007, 43, 1-19.	none	N	no definition
Hagemann, S.; Dümenil, L. Comparison of two global wetland datasets. SPIE Proceedings - Earth Surface Remote Sensing 1997, 3222, 193-200.	"Wetlands, by definition, are characterized by water saturation in the root zone, at, or above the soil surface, for a certain amount of time during the year."	N	distinct wetland definition	BZ
Henderson, F.M.; Lewis, A.J. Radar detection of wetland ecosystems: a review. International Journal of Remote Sensing 2008, 29, 5809-5835.	none	N	no definition
Jet Propulsion Laboratory, NASA. Wetlands - Global Monitoring of Wetland Extent and Dynamics. http://wetlands.jpl.nasa.gov/ (accessed on 17.9.2014).	none	N	no definition but delineation by surface properties (inundated area)	DZ	inundated wetlands
Jones, K.; Lantier, Y.; VanDerVoet, P.; Van Valekngoed, E.; Taylor, D.; Fernández-Prieto, D. Monitoring and Assessment of Wetlands using Earth Observation: The GlobWetland project. in Proceedings of GlobWetland: Looking at Wetlands from Space 2006.	none	N	Ramsar definition
Junk, W.J. General Aspects of Floodplain Ecology with Special Reference to Amazonian Floodplains. In The Central Amazon Floodplain; Junk, Ed.; Springer: Berlin/ Heidelberg, Germany, 1997; Ecological Studies, 126, pp. 3-20.	"Floodplains are wetlands which oscillate between terrestrial and aquatic phases"	N	distinct wetland definition	AZ
Kaplan, J.O. Wetlands at the Last Glacial Maximum: Distribution and methane emissions. Geophysical Research Letters 2002, 29, 3.1-3.4.	none	N	no definition but delineation by surface properties (areas flat enough for wetlands)	EZ
Klemas, V. Remote sensing of emergent and submerged wetlands: an overview. International Journal of Remote Sensing 2013, 34, 6286-6320.	none	N	no definition
Kotze, D.C.; Ellery, W.N.; Macfarlane, D.M.; Jewitt, G.P.W. A rapid assessment method for coupling anthropogenic stressors and wetland ecological condition. Ecological Indicators 2012, 13, 284-293.	none	N	no definition
Lehner, B.; Döll, P. Development and Validation of a global database of lakes, reservoirs and wetlands. Journal of Hydrology 2004, 296, 1-22.	Ramsar: “wetlands are areas of marsh, fen, peatland or water, whether natural or artificial, permanent of temporary, with water that is static or flowing, fresh, brackish or salt, including areas of marine water the depth of which at low tide does not exceed 6 metres."	N	Ramsar definition
Lemly, A.D.; Kingsford, R.T.; Thompson, J.R. Irrigated Agriculture and Wildlife Conservation: Conflict on a Global Scale. Environmental Management 2000, 25, 485-512.	none	N	no definition
Lewis, W.M. Wetlands Explained; Oxford University Press: New York, USA, 2001.	"Wetlands [...] are places where heavy equipment is likely to churn up mud even after the weather has been dry for some time"	N	distinct wetland definition	BZ
Lopez, R.D.; Lyon, J.G.; Lyon, L.K.; Lopez, D.K. Wetland Landscape Characterization - Practical Tools, Methods, and Approaches for Landscape Ecology; CRC Press: Boca Raton, USA, 2013.	"Wetlands are land areas that are periodically flooded or covered with water"	N	distinct wetland definition	BZ
Lugo, A.; Brown, S.; Brinson, M.M. Forested wetlands in freshwater and salt-water environments. Limnology and Oceanography 1988, 33, 894-909.	none	N	no definition
Lyon, J.G. Practical Handbook for Wetland Identification and Delineation; CRC Press: Boca Raton, USA, 1993.	"a wetland is the edge or interface between uplands and adjcent water areas" or: "Potential Jurisdictional Wetland: where land and water areas exhibiting one or more of the three federal criteria: plants, soil, and hydrology"	N	distinct wetland definition	CZ
Lyon, J.G.; Lopez, R.D.; Lyon, L.K.; Lopez, D.K. Wetland Landscape Characterization: GIS, Remote Sensing and Image Analysis; CRC Press: Boca Raton, USA, 2001.	"Wetlands are land areas that are periodically flooded or covered with water"	N	distinct wetland definition	BZ
Lyon, J.G.; McCarthy, J. Wetland and Environmental Applications of GIS. CRC Press: Boca Raton, USA, 1995.	Lyon_1993: "Potential Jurisdictional Wetland: where land and water areas exhibiting one or more of the three federal criteria: plants, soil, and hydrology"	N	distinct wetland definition
MacFarlane, D.M.; Kotze, D.C.; Ellery, W.N.; Walters, D.; Koopman, V.; Goodman, P.; Goge, C. WET-Health - A technique for rapidly assessing wetland health; Water Resources Comission: Gezina, South Africa, 2008.	"The National Water Act defines wetlands as: ‘land which is transitional between terrestrial and aquatic systems where the water table is usually at or near the surface, or the land is periodically covered with shallow water, and which in normal circumstances supports or would support vegetation typically adapted to life in saturated soils.’" (South Africa)	N	distinct wetland definition	BZ
MacKay, H.; Finlayson, C.M.; Fernández-Prieto, D.; Davidson, N.; Pritchard, D.; Rebelo, L.-M. The role of Earth Observation technologies in supporting implementation of the Ramsar Convention on Wetlands. Journal of Environmental Management 2009, 90, 2234–2242.	none	N	Ramsar definition
Maltby, E.; Barker, T. The Wetlands Handbook; Blackwell Publishing Ltd: West Sussex, UK, 2009.	none	Y	no definition but discussion of definitions
Matthews, E.; Fung, I. Methane emission from natural wetlands: Global distribution, area, and environmental characteristics of sources. Global Biogeochemical Cycles 1987, 1, 61-86.	none	N	no definition
Matthews. Feuchtgebiete - Schutz und Erhaltung im Rahmen der Ramsar-Konvention;Bundesministerium für Umwelt, Jugend und Familie: Vienna, Austria, 1993.	Ramsar "[S]eichte Gewässer [...] sowie jedes Stück Land, das regelmäßig oder periodisch überschwemmt oder mit Wasser gesättigt ist [...]."	N	Ramsar definition	BZ
Mayer, A.L.; Lopez, R.D. Use of Remote Sensing to Support Forest and Wetlands Policies in the USA. Remote Sensing 2011, 3, 1211-1233.	none	N	no definition
Melack, J.M. Tropical Freshwater Wetlands. In Remote Sensing for Natural Resource Management and Environmental Monitoring, 4th ed.; Ustin, S.L., Ed.; Wiley: Hoboken, USA, 2004.	none	N	no definition
Melack, J.M.; Hess, L.L. Remote Sensing of Wetlands on a Global Scale. SIL news 2004, 42, 1-5.	none	N	no definition
Middleton, B.A. Global Change and the Function and Distribution of Wetlands; Springer: New York, USA, 2012.	none	N	no definition
Millenium Ecosystem Assessment. Ecosystems and Human Well-Being: Wetlands and Water - Synthesis; World Resources Institute: Washington DC, USA, 2005.	Ramsar: “wetlands are areas of marsh, fen, peatland or water, whether natural or artificial, permanent of temporary, with water that is static or flowing, fresh, brackish or salt, including areas of marine water the depth of which at low tide does not exc	N	Ramsar definition
Mitsch, W.J. Global Wetlands Old World and New; Elsevier Science B.V.: Amsterdam, Netherlands, 1994.	none	N	no definition
Mitsch, W.J.; Gosselink, J.G. Wetlands, 4th ed.; Wiley: New York, USA, 2007.	none	Y	no definition but discussion of definitions
Mombo, F.; Speelman, S.; Van Huylenbroeck, G.; Hella, J.; Pantaleo, M.; Stein, M. Ratification of the Ramsar convention and sustainable wetland management: Situation analysis of the Kilombero Valley wetlands in Tanzania. Journal of Agricultural Extension and Rural Development 2011, 3, 153–164.	none	N	Ramsar definition
Mulamoottil, G.; Warner, B.G.; McBean, E.A. Wetlands - Environmental Gradients, Boundaries, and Buffers; CLC Press: Boca Raton, USA, 1996.	none	Y	no definition but discussion of definitions
National Research Council. Wetlands: Characteristics and Boundaries; National Academy Press: Washington DC, USA, 1995.	none	Y	no definition but discussion of definitions
Niering, W.A. Wetlands; Knopf: n./A., n./A., 1985.	areas “where water is the primary factor controlling the environment and the associated plant and animal life”	N	distinct wetland definition	BZ
Northern Ireland Environment Agency. Global Peatlands. http://www.doeni.gov.uk/niea/biodiversity/habitats-2/peatlands/about_peatlands/global_peatland.htm (accessed on 20.6.2014).	none	N	no definition		peatlands
Ozesmi, S.L.; Bauer, M.E. Satellite Remote Sensing of Wetlands. Wetlands Ecology and Management 2002, 10, 381-402.	none	N	no definition
Prigent, C.; Matthews, E.; Aires, F.; Rossow, W.B. Remote sensing of global wetland dynamics with multiple satellite data sets. Geophysical Research Letters 2001, 28, 4631-4634.	none	N	no definition but delineation by surface properties Inundated area)	DZ
Ramsar Convention Secretariat. Classification System for Wetland Type. http://www.ramsar.org/cda/en/ramsar-news-latest-classification-system/main/ramsar/1-26-76%5E21235_4000_0__ (Accessed on 15.9.2014).	Ramsar: “wetlands are areas of marsh, fen, peatland or water, whether natural or artificial, permanent of temporary, with water that is static or flowing, fresh, brackish or salt, including areas of marine water the depth of which at low tide does not exceed 6 metres"	N	Ramsar definition
Ramsar Convention Secretariat. Ramsar Information paper No.1 - What are Wetlands?. http://persona.uk.com/A21Ton/Core_dox/J/J1.pdf (accessed on 20.12.2014).	Ramsar: “wetlands are areas of marsh, fen, peatland or water, whether natural or artificial, permanent of temporary, with water that is static or flowing, fresh, brackish or salt, including areas of marine water the depth of which at low tide does not exceed 6 metres."	N	Ramsar definition
Ramsar Convention Secretariat. The Ramsar List of Wetlands of International Importance. http://www.ramsar.org/sites/default/files/documents/library/sitelist.pdf (Accessed on 15.9.2014).	Ramsar: “wetlands are areas of marsh, fen, peatland or water, whether natural or artificial, permanent of temporary, with water that is static or flowing, fresh, brackish or salt, including areas of marine water the depth of which at low tide does not exceed 6 metres."	N	Ramsar definition
Rebelo, L.-M.; Finlayson, C. M.; Nagabhatla, N. Remote Sensing and GIS for wetland inventory, mapping and change analysis. Journal of Environmental Management, 2009, 90, 2144–2153.	none	N	Ramsar definition
Roggeri, H. Tropical Freshwater Wetlands - A Guide to Current Knowledge and Sustainable Management; Kluwer Academic Publishers: London, UK, 1995.	US FWS (Cowardin_etal_1979): "lands transitional between terrestrial and aquatic systems where the water table is usually at or near the surface or the land is covered by shallow water"	N	US FWS definition
Rundquist, D.C.; Narumalani, S.; Narayanan, R.M. A review of wetlands remote sensing and defining new considerations. Remote Sensing Reviews 2001, 20, 207-226.	none	N	no definition
Sahagian, D.; Melack, J. Global Wetland Distribution and Functional Characterization: Trace Gases and the Hydrologic Cycle. UNT Digital Library: Stockholm, Sweden, 1998.	"An area in which: (a) the water table is at or near the soil surface for a significant part of the growing season; and (b) soils are covered by active vegetation (during the period of water saturation)”	N	distinct wetland definition	BZ
Scott, D. A. & Jones, T. A. Classification and inventory of wetlands: A global overview. Vegetatio 1995, 118, 3–16.	none	Y	no definition but discussion of definitions
Semeniuk, C. A. & Semeniuk, V. A geomorphic approach to global classification for inland wetlands. Vegetatio 1995, 118, 103–124.	"The definition in this paper, as used by Semeniuk (1987), adopted from the Wetlands Advisory Committee (1977 ) is that of 'areas of seasonally, intermittently or permanently waterlogged soils or inundated land, whether natural or otherwise, fresh or saline'. This would include areas with waterlogged soils, ponds, billabongs, lakes, swamps, rivers and their tributaries, as well as marine and coas…	N	distinct wetland definition	BZ
Semeniuk, V.; Semeniuk, C.A. A geomorphic approach to global classification for natural inland wetlands and rationalization of the system used by the Ramsar Convention – a discussion. Wetlands Ecology and Management 1997, 5, 145–158.	none	Y	no definition but discussion of definitions
Shephard, R.B. Wetlands: An Introduction For The Non-Scientist; Applied Ecosystem Services Inc.: n./A., n./A., 2006.	none	Y	no definition but discussion of definitions
Stacke, T. & Hagemann, S. Development and evaluation of a global dynamical wetlands extent scheme. Hydrology and Earth System Science 2012, 16, 2915–2933.	"In our approach, wetlands are defined as the occurrence of surface water that covers a certain area fraction in a model grid cell"	N	distinct wetland definition	EZ
Tiner, R.W. In search of swampland - a wetland sourcebook and fieldguide, 2nd ed.; Rutgers University Press: New Brunswick, USA, 2005.	"Wetlands are a diverse collection of areas where the presence of water for extended periods exerts a controlling influence on the plant community, soil properties, and animals living in them or using them"	N	distinct wetland definition	BZ
Tiner, R.W. Technical Aspects of Wetlands - Wetland Definitions and Classifications in the United States. In National Water Summary on Wetland Resources; USGS: Washington DC, USA, 1996; National Water Summary Series, 2425, pp. 27-34.	"'Wetland' is a generic term for all the different kinds of wet habitats - implying that it is land that is wet for some period of time, but not necessarily permanently wet"	N	distinct wetland definition	BZ
Tiner, R.W. Wetlands; In Encyclopedia of Inland Waters; Elsevier Academic Press: Amsterdam, Netherlands, 2009.	"Wetlands are aquatic to semiaquatic ecosystems where permanent or periodic inundation or prolonged water logging creates conditions favoring the establishment of aquatic life"	N	distinct wetland definition	BZ
Tooth, S. & McCarthy, T. S. Wetlands in drylands: geomorphological and sedimentological characteristics, with emphasis on examples from southern Africa. Progress in Physical Geography 2007, 31, 3-41.	"Wetlands are areas that are periodically or continuously inundated by shallow water or have saturated soils, and where plant growth and other biological activity are adapted to the wet conditions. Wetlands occupy an intermediate position between terrestrial and fully aquatic ecosystems (Zoltai, 1988; Finlayson and van der Valk, 1995a; Rogers, 1995; Mulamoottil et al., 1996)"	N	distinct wetland definition	BZ
Torbick, N.; Persson, A.; Olefeldt, D.; Frolking, S.; Salas, W.; Hagen, S.; Crill, P.; Changsheng, L. High Resolution Mapping of Peatland Hydroperiod at a High-Latitude Swedish Mire. Remote Sensing 2012, 4, 1974–1994.	none	N	no definition	EZ
UNESCO. Convention on Wetlands of International Importance especially as Waterfowl Habitat 1971. http://portal.unesco.org/en/ev.php-URL_ID=15398&URL_DO=DO_TOPIC&URL_SECTION=201.html (accessed on 12.6.2014).	Ramsar: “wetlands are areas of marsh, fen, peatland or water, whether natural or artificial, permanent of temporary, with water that is static or flowing, fresh, brackish or salt, including areas of marine water the depth of which at low tide does not exceed 6 metres."	N	Ramsar definition
United States Environmental Protection Agency. Section 404 of the Clean Water Act: How Wetlands are Defined and Identified. http://water.epa.gov/type/wetlands/outreach/fact11.cfm (accessed on 21.8.2014).	"Wetlands are areas that are inundated or saturated by surface or ground water at a frequency and duration sufficient to support, and that under normal circumstances do support, a prevalence of vegetation typically adapted for life in saturated soil conditions. Wetlands generally include swamps, marshes, bogs, and similar areas."	N	distinct wetland definition	BZ
Verhoeven, J.T.A.; Beltman, B.; Bobbink, R.; Whigham, D.F. Wetlands and Natural Resource Management; Springer: Berlin, Germany, 2006.	none	N	no definition
Von der Heyden, C. J. The hydrology and hydrogeology of dambos: a review. Progress in Physical Geography, 2004, 28, 544–564.	"Dambos are shallow, seasonally waterlogged, tropical and subtropical African wetlands"	N	distinct wetland definition	AZ	dambos as wetland subgroup
Wetland International. African Wetlands - Peatlands. http://africa.wetlands.org/Africanwetlands/Peatlands/tabid/2942/language/en-GB/Default.aspx (accessed on 20.6.2014).	"Peatlands are ecosystems where - under conditions of permanent water saturation – dead and decaying plant material has acumulated to form a thick organic soil layer called peat."	N	distinct wetland definition	AZ	peatlands
Wilen, B.O.; Bates, M.K. The US Fish and Wildlife Service’s National Wetlands Inventory Project. Vegetatio 1995, 118(1-2), 153-169.	US FWS (Cowardin_etal_1979): "lands transitional between terrestrial and aquatic systems where the water table is usually at or near the surface or the land is covered by shallow water"	N	US FWS definition
Winning, G. Some problems in determining the boundaries of SEPP 14 Wetlands. Wetlands (Australia) 1991, 11, 10–20.	none	Y	no definition but discussion of definitions
Winning, G.; King, J.-P.; Bailey, S. How wide is a wetland boundary? Wetlands (Australia) 2000, 18, 64-71.	none	N	no definition
Wolman, M. G. & Leopold, L. B. River flood plains; some observations on their formation. USGS Professional Paper 1957, 282, n./A.	"A definition of a floodplain often quoted is "a strip of relatively smooth land bordering a stream called a living flood plain if it is overflowed in times of high water" (Rice, 1949, p. 139)"	N	distinct wetland definition	AZ	floodplains
Zedler, J. B. & Kercher, S. WETLAND RESOURCES: Status, Trends, Ecosystem Services, and Restorability. Annual Review of Environment and Resources 2005, 30, 39-74.	"Wetlands are areas “where water is the primary factor controlling the environment and the associated plant and animal life” (1). " (Niering, 1985 - Wetlands)	N	distinct wetland definition	BZ
Zedler, P. H. Vernal pools and the concept of ‘isolated wetlands’. Wetlands 2003, 23, 597–607.	"Vernal pools, broadly defined as ephemeral wetlands that predictably form in permanent basins during the cooler part of the year but which dry during the summer months"	N	distinct wetland definition	AZ	vernal pools
Zomer, R.J.; Trabucco, A.; Ustin, S.L. Building spectral libraries for wetlands land cover classification and hyperspectral remote sensing. Journal of Environmental Management 2009, 90, 2170-2177.	none	N	no definition

## Sheet: Wetlands case studies
Publication	Definition	Discussion of definitions?	Group figure 2	Group figure 4	Specific wetland type?		Remote sensing publication?
Acreman, M.C.; Hollis, G.E. Water Management and Wetlands in Sub-Saharan Africa; International Union for Conservation of Nature(IUCN): Gland, Switzerland, 1996.	Ramsar: “wetlands are areas of marsh, fen, peatland or water, whether natural or artificial, permanent of temporary, with water that is static or flowing, fresh, brackish or salt, including areas of marine water the depth of which at low tide does not exceed 6 metres."	N	Ramsar definition				N
Akumu, C.E.; Pathirana, S.; Baban, S.; Bucher, D. Modeling Methane Emission from Wetlands in North-Eastern New South Wales, Australia Using Landsat ETM+. Remote Sensing 2010, 2(5), 1378-1399.	Ramsar: “wetlands are areas of marsh, fen, peatland or water, whether natural or artificial, permanent of temporary, with water that is static or flowing, fresh, brackish or salt, including areas of marine water the depth of which at low tide does not exceed 6 metres"	N	Ramsar definition				Y
Alsdorf, D.E. Water Storage of the Central Amazon Floodplain Measured with GIS and Remote Sensing Imagery. Annals of the Association of American Geographers 2003, 93(1), 55-66.	none	N	no definition				Y
Arbuckle, C.J.; Huryn, A.D.; Israel, S.A. Applications of Remote Sensing and GIS to Wetland Inventory: upland bogs. In: Proceedings of the Spatial Information Research Centre’s 10th Colloquium, University of Otago, New Zealand, 1998; 15-24.	"upland bogs represent an assemblage of wetlands ranging from “plumb pudding” bogs, liverwort bogs, sedge meadows, meander ponds and sphagnum bogs (Stephenson, 1983)"	N	distinct wetland definition	AX	upland bogs		Y
Augusteijn, M.F.; Warrender, C.E. Wetland classification using optical and radar data and neural network classification. International Journal of Remote Sensing 1998, 19(8), 1545-1560.	US FWS (Cowardin_etal_1979): "lands transitional between terrestrial and aquatic systems where the water table is usually at or near the surface or the land is covered by shallow water"	N	US FWS definition	BX			Y
Baghdadi, N.; Bernier, M.; Gauthier, R.; Neeson, I. Evaluation of C-band SAR data for wetlands mapping. International Journal of Remote Sensing 2001, 22(1), 71-88.	none	N	no definition				Y
Baker, C.; Lawrence, R.; Montagne, C.; Patten, D. Mapping Wetlands and Riparian areas using Landsat ETM+ Imagery and Decision-Tree-Based Models. Wetlands 2006, 26(2), 465-474.	EPA_2012: "Wetlands are '[areas] that under normal circumstances do support. . . a prevalence of vegetation typically adapted for life in saturated soil conditions'" (EPA Section 404 on the clean water act (http://water.epa.gov/type/wetlands/outreach/fact11.cfm)	N	distinct wetland definition	BX			Y
Baker, C.; Lawrence, R.L.; Montagne, C.; Patten, D. Change detection of wetland ecosystems using Landsat imagery and change vector analysis. Wetlands 2007, 27(3), 610-619.	none	N	no definition				Y
Baldwin, A.H.; Jensen, K.; Schönfeldt, M. Warming increases plant biomass and reduces diversity across continents, latitudes, and species migration scenarios in experimental wetland communities. Global Change Biology 2014, 20, 835-850.	none	N	no definition				N
Barbosa, C.; Hess, L.; Melack, J.; Novo, E.; Gastil, M.; Dutra, L. Mapping Amazon Basin Wetlands through Region Growing Segmentation and Unsupervised Region Classification of JERS-1 Data. Proceedings of the IX Latin American Symposium on Remote Sensing (SELPER), Puerto Iguazu, Argentina, 2000.	none	N	no definition				Y
Barker, R.; King, D.J. Blanding’s Turtle (Emydoidea blandingii) Potential Habitat Mapping Using Aerial Orthophotographic Imagery and Object Based Classification. Remote Sensing 2012, 4(1), 194-219.	"For the purposes of this study, wetlands were defined as areas with standing water in spring, including small ponds, some being ephemeral, as well as areas with typical wetland vegetation of grasses, sedges, and cattails (Typha spp.). Inundated forest areas were excluded because they were not expected to be easily mapped due to the often significantpresence of submerged or floating leaf litter, …	N	distinct wetland definition	BX			Y
Bartlett, K.B.; Crill, P.M.; Bonassi, J.A.; Richey, J.E.; Harriss, R.C. Methane flux from the Amazon River floodplain: Emissions during rising water. Journal of Geophysical Research: Atmospheres 1990, 95(D10), 16773-16788.	"floodplain habitats: open water, grass mats and flooded forest "	N	distinct wetland definition	AY	floodplains		N
Beamish, D. Peat Mapping Associations of Airborne Radiometric Survey Data. Remote Sensing 2014, 6(1), 521-539.	none	N	no definition but delineation by surface properties (peat soils)	DX	peatlands		Y
Bourgeau-Chavez, L.L.; Kasischke, E.S.; Brunzell, S.M.; Mudd, J.P.; Smith, K.B.; Frick, A.L. Analysis of space-borne SAR data for wetland mapping in Virginia riparian ecosystems. International Journal of Remote Sensing 2001, 22(18), 3665-3687.	none	N	no definition				Y
Brivio, P.A.; Colombo, R.; Maggi, M.; Tomasoni, R. Integration of remote sensing data and GIS for accurate mapping of flooded areas. International Journal of Remote Sensing 2002, 23(3), 429-441.	none	N	no definition but delineation by surface properties (flooded area)	DX			Y
Bwangoy, J.-R.B.; Hansen, M.C.; Roy, D.P.; De Grandi, G.; Justice, C.O. Wetland mapping in the Congo basin using optical and remotely sensed data and derived topographical indices. Remote Sensing of Environment 2010, 114, 73-86.	US FWS (Cowardin_etal_1979): "lands transitional between terrestrial and aquatic systems where the water table is usually at or near the surface or the land is covered by shallow water"	N	US FWS definition	BY			Y
Chopra, R.; Verma, V.K.; Sharma, P.K. Mapping, monitoring and conservation of Harike wetland ecosystem, Punjab, India, through remote sensing. International Journal of Remote Sensing 2001, 22(1), 89-98.	none	N	no definition				Y
Collins, H. Vegetation Based Indicators of Agriculturally Used Wetlands in East Africa. PhD thesis, University of Bonn, 2011.	"Small to medium sized land units characterized by seasonal freshwater flows and soil flooding or saturation (explicitely excluded [...] in contrast to the Ramsar convention are open water bodies [...].)	N	distinct wetland definition	BY			N
Conchedda, G.;Durieux, L.; Mayaux, P. An object-based method for mapping and change analysis in mangrove ecosystems. ISPRS Journal of Photogrammetry and Remotes Sensing 2008, 63(5), 578-589.	"Mangroves form forest intertidal ecosystems along tropical and sub-tropical coasts"	N	distinct wetland definition	AX	mangroves		Y
Corcoran, J.; Knight, J.; Brisco, B.; Kaya, S.; Cull, A.; Murnaghan, K. The integration of optical, topographic, and radar data for wetland mapping in northern Minnesota. Canadian Journal of Remote Sensing 2011, 37(5), 564-582.	none	N	no definition				Y
Corcoran, J.M.; Knight, J.F.; Gallant, A.L. Influence of Multi-Source and Multi-Temporal Remotely Sensed and Ancillary Data on the Accuracy of Random Forest Classification of Wetlands in Northern Minnesota. Remote Sensing 2013, 5(7), 3212-3238.	US FWS (Cowardin_etal_1979): "lands transitional between terrestrial and aquatic systems where the water table is usually at or near the surface or the land is covered by shallow water"	N	US FWS definition				Y
Dabrowska-Zielinska, K.; Budzynska, M.; Tomaszewska, M.; Bartold, M.; Gatkowska, M.; Malek, I.; Turlej, K.; Napiorkowska, M. Monitoring Wetlands Ecosystems Using ALOS PALSAR (L-Band, HV) Supplemented by Optical Data: A Case Study of Biebrza Wetlands in Northeast Poland. Remote Sensing 2014, 6(2), 1605-1633.	none	N	no definition				Y
Davranche, A.; Lefebvre, G.; Poulin, B. Wetland monitoring using classification trees and SPOT-5 seasonal time series. Remote Sensing of Environment 2010, 114(3), 552-562.	none	N	no definition				Y
De Roeck, E.R.; Verhoest, N.E.C.; Miya, M.H.; Lievens, H.; Batelaan, O.; Thomas, A.; Brendock, L. Remote Sensing and Wetland Ecology: a South African Case Study. Sensors 2008, 8, 3542-3556.	none	N	no definition				Y
Decharme, B.; Douville, H.; Prigent, C.; Papa, F.; Aires, F. A new river flooding scheme for global climate applications: Off-line evaluation over South America. Journal of Geophysical Research: Atmospheres 2008, 113(D11).	none	N	no definition but delineation by surface properties (inundation)	DY			N
DeGrandi, G.F.; Mayaux, P.; Rosenqvist, A.; Rauste, Y.; Saatchi, S.; Simard, M.; Leysen, M. Flooded forest mapping at regional scale in the central Africa Congo river basin: First thematic results derived by ERS-1 and JERS-1 radar mosaics. Proceedings of Retrieval of Bio- and geo-physical parameters from SAR data for Land Applications Workshop, Nordwijk, 1998.	The tropical ﬂoodplains can be deﬁned as pulsating systems which oscillate between terrestrial and aquatic phases"	N	distinct wetland definition	AY	floodplains		Y
Dronova, I.; Gong, P.; Clinton, N.E.; Wang, L.; Fu, W.; Qi, S.; Liu, Y. Landscape analysis of wetland plant functional types: The effects of image segmentation scale, vegetation classes and classification methods. Remote Sensing of Environment 2012, 127, 357-369.	none	N	Ramsar definition	BX			Y
Dronova, I.; Gong, P.; Wang, L. Object-based analysis and change detection of major wetland cover types and their classification uncertainty during the low water period at Poyang Lake, China. Remote Sensing of Environment 2011, 115(12), 3220-3236.	none	N	no definition				Y
Durai, A.; Kalavathy, S.; Gokula, V.; Muthukrishnan, A. Identification of potential wetlands in Tiruchirappalli District, Tamil Nadu, India 2014. International Journal of Environment 2013/14, 3(1), 78-84.	none	N	no definition				Y
Dwivedi, R.S.; Rao, B.R.M.; Bhattacharya, S. Mapping wetlands of the Sundaban Delta and it’s environs using ERS-1 SAR data. International Journal of Remote Sensing 1999, 20(11), 2235-2247.	US FWS (Cowardin_etal_1979): "lands transitional between terrestrial and aquatic systems where the water table is usually at or near the surface or the land is covered by shallow water"	N	US FWS definition				Y
El-Refaie, G. Temperature impact on operation and performance of Lake Manzala Engineered Wetland, Egypt. Ain Shams Engineering Journal 2010, 1(1), 1-9.	"Wetlands are often transitional habitats between terrestrial and aquatic systems, where the water table is usually at or near the surface or the land is covered by shallow water" (Cheremisinoff PN. Wastewater treatment technology; encyclopedia of environmental control technology, vol. 3. Houston, Texas, USA: Gulf Publishing Company; 1989)	N	distinct wetland definition	BX			N
FAO. Wetland Characterization and Classification for sustainable agricultural development; FAO: Rome/ Harare, Italy/ Zimbabwe, 1998.	none	Y	no definition but discussion of definitions				N
Finlayson, C.M.; Rea, N. Reasons for the loss and degradation of Australian wetlands. Wetlands Ecology and Management 1999, 7(1-2), 1-11.	Ramsar: “wetlands are areas of marsh, fen, peatland or water, whether natural or artificial, permanent of temporary, with water that is static or flowing, fresh, brackish or salt, including areas of marine water the depth of which at low tide does not exceed six metres." and: Paijmans_etal_1985 “...land permanently or temporarily under water or waterlogged. Temporary wetlands must have surface wa…	N	Ramsar definition				N
Fournier, R.A.; Grenier, M.; Lavoie, A.; Hélie, R. Towards a strategy to implement the Canadian Wetland Inventory using satellite remote sensing. Canadian Journal of Remote Sensing 2007, 33(1), 1-16.	Tarnocai_1980: "'..land that is saturated with water long enough to promote wetland or aquatic process as indicated by poorly drained soils, hydrophytic vegetation and various kind of biologocal activity adapted to wet environment'"	N	distinct wetland definition	BY			Y
Franke, J.; Becker, M.; Menz, G.; Misana, S.; Mwita, E.; Nienkemper, P. Aerial imagery for monitoring land use in East African Wetland Ecosystems. in Geoscience and Remote Sensing Symposium, 2009 IEEE International, IGARSS 2009, 5, V–288-V–291.	none	N	no definition				Y
Frazier, P.; Page, K.; Louis, J.; Briggs, S.; Robertson, A.I. Relating wetland inundation to river flow using Landsat TM data. International Journal of Remote Sensing 2003, 24(19), 3755-3770.	none	N	no definition but delineation by surface properties (inundation)	DX			Y
Frazier, P.S.; Page, K.J. Water body detection and delineation with Landsat TM data. Photogrammetric Engineering and Remote Sensing 2000, 66(12), 1461-1467.	none	N	no definition				Y
Fuller, R.M.; Groom, G.B.; Mugisha, S.; Ipulet, P.; Pomeroy, D.; Katende, A.; Bailey, R.; Ogutu-Ohwayo, R. The integration of field survey and remote sensing for biodiversity assessment: a case study in the tropical forsets and wetlands of Sango Bay, Uganda. Biological Conservation 1998, 86(3), 379-391.	none	N	no definition				Y
Gibbs, J.P. Wetland Loss and Biodiversity Conservation. Conservation Biology 2000, 14(1), 314-317.	none	N	no definition				N
Gilmore, M.S.; Wilson, E.H.; Barret, N.; Civco, D.L.; Prisloe, S.; Hurd, J.D.; Chadwick, C. Integrating multi-temporal spectral and structural information to map wetland vegetation in a lower Connecticut River tidal marsh. Remote Sensing of Environment 2008, 112, 4048-4060.	none	N	no definition				Y
Glooschenko, V. Development of an evaluation system for wetlands in Southern Ontario. Wetlands 1983, 3(1), 192-200.	none	N	no definition				N
Gómez-Rodríguez, C.; Bustamante, J.; Díaz-Paniagua, C. Evidence of Hydroperiod Shortening in a Preserved System of Temporary Ponds. Remote Sensing 2010, 2(6), 1439-1462.	"shallow water bodies with a recurrent annual dry phase that remain flooded long enough to allow the development of (semi) aquatic vegetation and animal communities"	N	distinct wetland definition	AX	temporary ponds		Y
Gong, P.; Niu, Z.; Cheng, X.; Zhao, K.; Zhou, D.; Liang, L.; Wang, X.; Li, D.; Huang, H.; Wang, Y.; Li, W.; Wang, X.; Ying, Q.; Yang, Z.; Ye, Y.; Li, Z.; Zhuang, D.; Chi, Y.; Zhou, H.; Yan, J. China’s wetland change (1990–2000) determined by remote sensing. Science in China, Earth Sciences 2010, 53(7), 0136-1042.	(??) "Wetland refers to areas covered by natural or artificial , permanent or temporal still-water or running-water, fresh-water, salt-water marshes, peatlands, or water bodies including sea water less than 6 m in deoth under low tides"	N	distinct wetland definition	BY			Y
Haack, B. Monitoring Wetland Changes with Remote Sensing: An East African Example. Environmental Management 1996, 20(3), 411-419.	none	N	no definition				Y
Hamilton, S.K.; Kellndorfer, J.; Lehner, B.; Tobler, M. Remote Sensing of floodplain geomorphology as a surrogate for biodiversity in a tropical river system (Madre de Dios, Peru). Geomorphology 2007, 89, 23-38.	"floodplains, defined for our purposes as land adjacent to the rivers that is relatively level, in contrast to the older alluvium of the uplands that has subsequently become dissected by stream courses"	N	distinct wetland definition	AX	floodplains		Y
Harvey, K.R.; Hill, G.J.E. Vegetation mapping of a tropical freshwater swamp in the Northern Territory, Australia: A comparison of aerial photography, Landsat TM and SPOT satellite imagery. International Journal of Remote Sensing 2001, 22(15), 2911-2925.	none	N	no definition				Y
Hess, L.L.; Melack, J.M.; Novo, E.M.L.M.; Barbosa, C.C.F.; Gastil, M. Dual-season mapping of wetland inundation and vegetation for the central Amazon basin. Remote Sensing of Environment 2003, 87, 404-428.	none	N	no definition but delineation by surface properties (inundated areas and adjacent inundatable areas	DY			Y
Hogg, A.R.; Todd, K.W. Automated discrimination of upland and wetland using terrain derivatives. Canadian Journal of Remote Sensing 2007, 33(1), 68-83.	This current standard, known as the Ontario Wetland Evaluation System (OWES), defines wetlands as "lands that are seasonally or permanently flooded by water as well as lands where the water table is close to the surface; in either case the presence of water has caused the formation of hydric soils and has favoured the dominance of either hydrophytic or water tolerant plants" (OMNR_1993)	N	distinct wetland definition	BX			Y
Hughes, C.E.; Binning, P.; Willgoose, G.R. Characterisation of the hydrology of an estuarine wetland. Journal of Hydrology 1998, 211(1-4), 34-49.	"Estuarine wetlands are characterized by complex interactions between vegetation type, strong and frequent surface water movements (e.g. tides), and pore water movement (Hughes et al., 1998)."	N	distinct wetland definition	AX	estuarine wetlands		N
Hughes, R.H.; Hughes, J.S. A Directory of African Wetlands; International Union for Conservation of Nature and Natural Resources/ UN Environment Programme (UNEP)/ World Conservation Monitoring Centre (WCMC): n./A., n./A., 1992.	We have interpreted the term 'wetland' to include all areas of land that are permanently or periodically inundated, i.e. lakes, ponds, swamps, marshes, bogs, riverine and lacustrine floodplains, pans and wadis, coastal saltmarshes and mangrove swamps. Artificial impoundments are also included.	N	distinct wetland definition	BY			N
Huising, E.J. Wetland monitoring in Uganda. The International Archives of the Photogrammetry, Remote Sensing and Spatial Information Sciences n./A., XXXIV(6/W6), 127-135.	none	Y	no definition but discussion of definitions				Y
Islam, M.A.; Thenkabail, P.S.; Kulawardhana, R.W.; Alankara, R.; Gunasinghe, S.; Edussriya, C.; Gunawardana, A. Semi‐automated methods for mapping wetlands using Landsat ETM+ and SRTM data. International Journal of Remote Sensing 2008, 29(24), 7077-7106.	"Taking the Ramsar and USGS definitions into consideration, the wetlands mapped in this study included irrigated agriculture, fresh water bodies, salt pans, lagoons, mangroves, riparian vegetation, permanent marshes, water bodies with or without aquatic plants and seasonal wetlands."	N	distinct wetland definition	BX			Y
Iyango, L.; Mafabi, P; Musinguzi, M.; Namakambo, N.; Emwanu, T.; Muhwezi, B.J.; Okwi, P.; Owuor, J.; Henninger, N.; Landsberg, F. Mapping a better Future - How spatial Analysis can Benfit Wetlands and Reduce Poverty in Uganda; Wetlands Management Department, Ministy of Water and Environment, Uganda; Uganda Bureau of Statistics; International Livestock Research Institute; World Resources Institute…	Uganda’s National Policy for the Conservation and Management of Wetland Resources (1995) defines wetlands as areas “where plants and animals have become adapted to temporary or permanent flooding.” It includes permanently flooded areas with papyrus or grass swamps, swamp forests or high-altitude mountain bogs, as well as seasonal floodplains and grasslands. While all wetlands are characterized by…	N	distinct wetland definition	BY			Y
Jacome, A.; Bernier, M.; Chokmani, K.; Gauthier, Y.; Poulin, J.; De Sève, D. Monitoring Volumetric Surface Soil Moisture Content at the La Grande Basin Boreal Wetland by Radar Multi Polarization Data. Remote Sensing 2013, 5(10), 4919-4941.	"ecosystems in which the production of organic compounds has exceeded decomposition over thousands of years, resulting in a great accumulation over time of organic matter rich in carbon (peat)"	N	distinct wetland definition	AX	peatlands		Y
Jensen, J.R.; Christensen, E.J.; Sharitz, R. Nontidal wetland mapping in South Carolina using airborne multispectral scanner data. Remote Sensing of Environment 1984, 16(1), 1-12.	none	N	no definition				Y
Jensen, J.R.; Hodgson, M.E.; Christensen, E.; Halkard, M.E.; Tinney, L.R.; Sharitz, R. Remote Sensing Inland Wetlands: A Multispectral Approach. Photogrametric Engineering and Remote Sensing 1986, 52(1), 87-100.	none	N	no definition				Y
Junk, W.J.; Piedade, M.T.F.; Lourival, R.; Wittmann, F.; Kandus, P.; Lacerda, L.D.; Bozelli, R.L.; Esteves, F.A.; Nunes Da Cunha, C.; Maltchik, L.; Schöngart, J.; Schaeffer-Novelli, Y; Agostinho, A.A. Brazilian wetlands: their definition, delineation, and classification for research, sustainable management, and protection. Aquatic Conservation: Marine and Freshwater Ecosystems 2014, 24(1), 5-22.	"Wetlands are ecosystems at the interface between aquatic and terrestrial environments; they may be continental or coastal, natural or artificial, permanently or periodically inundated by shallow water or consist of waterlogged soils. Their waters may be fresh, or highly or mildly saline. Wetlands are home to specific plant and animal communities adapted to their hydrological dynamics."	Y	distinct wetland definition	BY			N
Kamukala, G.L. An overview and scope of Tanzanian wetlands. In Wetlands of Tanzania - Proceedings of a seminar on the wetlands of Tanzania; Kamukala, Crafter, Eds.; International Union for Conservation of Nature and Natural Resources: Morogoro, Tanzania, 1993; pp. 9-14.	none	N	no definition				N
Kaptué, A.T.; Hanan, N.P.; Prihodko, L. Characterization of the spatial and temporal variability of surface water in the Soudan-Sahel region of Africa. Journal of Geophysical Research: Biogeosciences 2013, 118, 1472-1483.	none	N	no definition but delineation by surface properties (surface water)	DY			Y
Kasischke, E.S.; Bourgeau-Chavez, L.L.; Rober, A.R.; Wyatt, K.H.; Waddington, J.M.; Turetsky, M.R. Effects of soil moisture and water depth on ERS SAR backscatter measurements from an Alaskan wetland complex. Remote Sensing of Environment 2009, 113(9), 1868-1873.	none	N	no definition				Y
Kasischke, E.S.; Smith, K.B.; Bourgeau-Chavez, L.L.; Romanowicz, E.A.; Brunzell, S.; Richardson, C.J. Effects of seasonal hydrologic patterns in south Florida wetlands on radar backscatter measured from ERS-2 SAR imagery. Remote Sensing of Environment 2003, 88(4), 423-441.	none	N	no definition				Y
Kenya Ministry of Environment and Mineral Resources (MEMR); UN Environment Programme (UNEP): Kenya Wetlands Atlas; MEMR: Nairobi, Kenya, 2012.	Ramsar: “wetlands are areas of marsh, fen, peatland or water, whether natural or artificial, permanent of temporary, with water that is static or flowing, fresh, brackish or salt, including areas of marine water the depth of which at low tide does not exceed metres."	N	Ramsar definition				Y
Kenya National Environment Management Authority (NEMA). Kenya - State of the Environment and Outlook 2010; NEMA: Nairobi, Kenya, 2011.	"According to the Environmental Management and Coordination Act (Wetlands, Riverbanks, Lakeshores and Seashores Management) Regulations 2009, wetlands are: ‘areas permanently or seasonally flooded by water where plants and animals have become adapted; and include swamps, areas of marsh, peat land, mountain bogs, banks of rivers, vegetation, areas of impeded drainage or brackish, salt or alkaline;…	N	distinct wetland definition	BY			Y
Kenya National Environment Management Authority (NEMA). Wetland Assessment an Monitoring Strategy for Kenya; NEMA: Naiobi, Kenya, 2012.	none	N	no definition				N
Kingsford, R.T.; Brandis, K.; Thomas, R.F.; Crighton, P.; Knowles, E.; Gale, E. Classifying landform at broad spatial scales: the distribution and conservation of wetlands in New South Wales, Australia. Marine and Freshwater Research 2004, 55(1), 17-31.	none	N	no definition				Y
Kotze, D.C.; O’Connor, T.G. Vegetation variation within and among palustrine wetlands along an altitudinal gradient in KwaZulu-Natal, South Africa. Plant Ecology 2000, 146, 77-96.	none	N	no definition				N
Kuria D.N.; Menz, G.; Misana, S.; Mwita, E.; Thamm, H.-P.; Alvarez, M.; Mogha, N.; Becker, M.; Oyieke, H. Seasonal Vegetation Changes in the Malinda Wetland Using Bi-Temporal, Multi-Sensor, Very High Resolution Remote Sensing Data Sets. Advances in Remote Sensing 2014, 3(1), 33-48.	none	N	SWEA definition	BX			Y
Laba, M.; Downs, R.; Smith, S.; Welsh, S.; Neider, C.; White, S.; Richmond, M.; Philpot, W.; Baveye, P. Mapping invasive wetland plants in the Hudson River National Estuarine Research Reserve using quickbird satellite imagery. Remote Sensing of Environment 2008, 112(1), 286-300.	estuaries are "Transitional places where salt and fresh water mix"	N	distinct wetland definition	AX	estuaries		Y
Lähteenoja, O.; Roucoux, K. Inception, history and development of Peatlands in the Amazon Basin. PAGES 2010, 18(1), 27-29.	none	N	no definition		peatlands		Y
Laikipia Wildlife Forum. Laikipia - A natural history guide; Laikipia Wildlife Forum: Nanyuki, Kenya, 2011.	none	N	no definition				N
Landmann, T.; Schramm, M.; Colditz, R.R.; Dietz, A.; Dech, S. Wide Area Wetland Mapping in Semi-Arid Africa Using 250-Meter MODIS Metrics and Topographic Variables. Remote Sensing 2010, 2(7), 1751-1766.	none	N	no definition but delineation by surface properties	DY			Y
Landmann, T.; Schramm, M.; Huettich, C.; Dech, S. MODIS based change vector analysis for assessing wetland dynamics in Southern Africa. Remote Sensing Letters 2013, 4(2), 104-113.	none	N	no definition				Y
Lang, M.W.; Kasischke, E.S.; Prince, S.D.; Pittman, K.W. Assessment of C-band synthetic aperture radar data for mapping and monitoring Coastal Plain forested wetlands in the Mid-Atlantic Region, U.S.A. Remote Sensing of Environment 2008, 112(11), 4120-4130.	none	N	no definition				Y
Lee, T.-M.; Yeh, H.-C. Applying remote sensing techniques to monitor shifting wetland vegetation: A case study of Danshui River estuary mangrove community. Ecological Engineering 2009, 35, 487-496.	Mangrove is an ecological term referring to a diverse aggregation of trees and shrubs that form the dominant plant communities in tidal saline wetlands along sheltered coasts.	N	distinct wetland definition	AX	mangroves		Y
Li, J.; Chen, W. A rule-based method for mapping Canada’s wetlands using optical, radar and DEM data. International Journal of Remote Sensing 2005, 26(22), 5051-5069.	none	N	no definition	EY			Y
Liira, J.; Feldmann, T.; Mäemets, H.; Peterson, U. Two decades of macrophyte expansion on the shores of a large shallow northern temperate lake - A retrospective series of satellite images. Aquatic Botany 2010, 93(4), 207-215.	none	N	no definition		shallow lake ecosystem		Y
Lowry, J.; Finlayson, C.M. A review of spatial datasets for wetland inventory in northern Australia. Supervising Scientist Report 178. Supervising Scientist: Canberra, Australia, 2004.	Ramsar: “wetlands are areas of marsh, fen, peatland or water, whether natural or artificial, permanent of temporary, with water that is static or flowing, fresh, brackish or salt, including areas of marine water the depth of which at low tide does not exceed 6 metres"	N	Ramsar definition				Y
Luo, J.; Ma, R.; Duan, H.; Hu, W.; Zhu, W.; Huang, W.; Lin, C. A New Method for Modifying Thresholds in the Classification of Tree Models for Mapping Aquatic Vegetation in Taihu Lake with Satellite Images. Remote Sensing 2014, 6(8), 7442-7462.	none	N	no definition				Y
Marti-Cardona, B.; Dolz-Ripolles, J.; Lopez-Martinez, C. Wetland inundation monitoring by the synergistic use of ENVISAT/ASAR imagery and ancillary spatial data. Remote Sensing of Environment 2013, 139, 171-184.	none	N	no definition				Y
Marti-Cardona, B.; Lopez-Martinez, C.; Dolz-Ripolles, J.; Bladè-Castellet, E. ASAR polarimetric, multi-incidence angle and multitemporal characterization of Doñana wetlands for flood extent monitoring. Remote Sensing of Environment 2010, 114, 2802-2815.	none	N	no definition	DX			Y
Martinez, J.-M.; Toan, T.L. Mapping of flood dynamics and spatial distribution of vegetation in the Amazon floodplain using multitemporal SAR data. Remote Sensing of Environment 2007, 108(3), 209-223.	none	N	no definition but delineation by surface properties (flood extent)	DY			Y
McCarthy, J.; Gumbricht, T.; McCarthy, T.S. Ecoregion classification in the Okavango Delta, Botswana from multitemporal remote sensing. International Journal of Remote Sensing 2005, 26(19), 4339-4357.	none	N	no definition				Y
Melack, J.M.; Hess, L.L. Remote Sensing of the Distribution and Extent of Wetlands in the Amazon Basin. In Amazonian Floodplain Forests; Junk, Piedade, Wittmann, Schöngart, Parolin, Eds. Springer: n./A., Netherlands; 2010; pp. 43-59.	"Wetlands cover extensive areas in the Amazon basin and are represented by [...] seasonally inundated forests and savannas, intermittently flooded riparian zones bordering streams and rivers, backwater swamps, coastal mangroves, palm-swamps and high-elevation bogs (Junk, 1997b)"	N	distinct wetland definition	EY			Y
Melesse, A.M.; Nangia, V.; Wang, X. McClain, M. Wetland Restoration Response Analysis using MODIS and Groundwater Data. Sensors 2007, 7, 1916-1933.	none	N	no definition				Y
Mertes, L.A.K.; Daniel, D.L.; Melack, J.M.; Nelson, B.; Martinelli, L.A.; Forsberg, B.A. Spatial patterns of hydrology, geomorphology, and vegetation on the floodplain of the Amazon river in Brazil from a remote sensing perspective. Geomorphology 1995, 13(1-4), 215-232.	none	N	no definition				Y
Michishita, R.; Gong, P.; Xu, B. Spectral mixture analysis for bi-sensor wetland mapping using Landsat TM and Terra MODIS data. International Journal of Remote Sensing 2012, 33(11), 3373-3401.	none	N	no definition				Y
Munyati, C. Wetland Change Detection on the Kafue Flats, Zambia, by classification of a multitemporal remote sensing image dataset. International Journal of Remote Sensing 2000, 21(9), 1787-1806.	none	N	no definition				Y
Murray, N.J.; Phinn, S.R.; Clemens, R.S.; Roelfsema, C.M.; Fuller, R.A. Continental Scale Mapping of Tidal Flats across East Asia Using the Landsat Archive. Remote Sensing 2012, 4(11), 3417-3426.	"the area between marine and terrestrial environments"	N	distinct wetland definition	AY	tidal flats		Y
Mwita, E. Remote Sensing based assessment of small wetlands in East Africa. PhD thesis, University of Bonn, 2010.	none	Y	no definition but discussion of definitions				Y
Mwita, E.; Menz, G.; Misana, S.; Becker, M.; Kisanga, D.; Boehme, B. Mapping small wetlands of Kenya and Tanzania using remote sensing techniques. International Journal of Applied Earth Observation and Geoinformation 2013, 21, 173-183.	none	N	no definition				Y
Mwita, E.; Menz, G.; Misana, S.; Nienkemper, P. Detection of small Wetlands with Multi Sensor Data in East Africa. Advances in Remote Sensing 2012, 1, 64-73.	SWEA "small wetlands, i.e., “land units of less than 500 ha that are characterized by permanent or seasonal flooding or by soil moisture availability higher than that of the surrounding uplands”" (sakane_etal_2012).	N	SWEA definition				Y
Nielsen, E.M.; Prince, S.D.; Koeln, G.T. Wetland change mapping for the U.S. mid-Atlantic region using an outlier detection technique. Remote Sensing of Environment 2008, 112(11), 4061-4074.	none	N	no definition				Y
Novo, E.M.; Shimabukuro, Y.E. Identification and mapping of the Amazon habitats using a mixing model. International Journal of Remote Sensing 1997, 18(3), 663–670.	"floodplain habitats: open water, grass mats and flooded forest ( Bartlett et al. 1990 )"	N	distinct wetland definition	AY	floodplains		Y
Ordoyne, C.; Friedl, M.A. Using MODIS data to characterize seasonal inundation patterns in the Florida Everglades. Remote Sensing of Environment 2008, 112(11), 4107-4119.	none	N	no definition but delineation by surface properties (inundation)	DX			Y
Papa, F.; Prigent, C.; Durand, F.; Rossow, W.B. Wetland dynamics using a suite of satellite observations: A case study of application and evaluation for the Indian Subcontinent. Geophysical Research Letters 2006, 33(8), 1-4.	none	N	no definition but delineation by surface properties (flooded area)	DY			Y
Parmuchi, M.G.; Karszenbaum, H.; Kandus, P. Mapping wetlands using multi-temporal RADARSAT-1 data and a decision-based classifier. Canadian Journal of Remote Sensing 2002, 28(2), 175-186.	none	N	no definition				Y
Pressey, R.L.; Adam, P. A review of wetland inventory and classification in Australia. Vegetatio 1995, 118, 81-101.	none	Y	no definition but discussion of definitions				N
Prospere, K.; McLaren, K.; Wilson, B. Plant Species Discrimination in a Tropical Wetland Using In Situ Hyperspectral Data. Remote Sensing 2014, 6(9), 8494-8523.	none	N	Ramsar definition				Y
Qi, S.; Brown, D.G.; Tian, Q,; Jiang, L.; Zhao, T.; Bergen, K.M. Inundation extent and flood frequency mapping using LANDSAT Iamagery and Digital Elevation Models. GIscience and Remote Sensing 2009, 46(1), 101-127.	none	N	no definition but delineation by surface properties (flooding dynamics)	DX	floodplains		Y
Quan, X.; He, B.; Wang, Y.; Tang, Z.; Li, X. An Extended Fourier Approach to Improve the Retrieved Leaf Area Index (LAI) in a Time Series from an Alpine Wetland. Remote Sensing 2014, 6(2), 1171-1190.	none	N	no definition				Y
Ray, R.; Mandal, S.; Dhara, A. Characterization and Mapping of Inland Wetland: A Case Study on selected Bils on Nadia District. International Journal of Scientific and Research Publications 2012, 2(12), 1-10.	"Wetlands are areas of land that are either temporarily or permanently covered by water. This means that a wetland is neither truly aquatic nor terrestrial; it is possible that wetlands can be both at the same time depending on seasonal variability."	N	distinct wetland definition	BX			Y
Reschke, J.; Bartsch, A.; Schlaffer, S.; Schepaschenko, D. Capability of C-Band SAR for Operational Wetland Monitoring at High Latitudes. Remote Sensing 2012, 4(10), 2923-2943.	none	N	no definition but delineation by surface properties (water saturated area)	DY			Y
Roshier, D.A.; Rumbachs, R.M. Broad-scale mapping of temporary wetlands in arid Australia. Journal of Arid Environments 2004, 56(2), 249-263.	"Wetlands of the arid interior of Australia are dynamic entities changing in extent, depth, turbidity and salinity as elements of the landscape periodically fill and dry (see Kingsford and Porter, 1994; Timms, 1993, 1998a; Sheldon et al., 2001)"	N	distinct wetland definition	BY			Y
Rwanda Environment Management Authority (REMA). Rwanda State of the Environment and Outlook; REMA: Kigali, Rwanda, 2009.	"The water table is near or above the lowest ground surface during the wet season and they do not have large flood plains (generally less than 200m wide) or great length (Chemonics International Inc. 2003)"	N	distinct wetland definition	BY			Y
Rwanda Environment Management Authority (REMA); Ministry of Natural Resources. Fourth National Report to the Convention on Biological Diversity. REMA: Kigali, Rwanda, 2009.	none	N	no definition				N
Rwanda Environment Management Authority. Atlas of Rwanda’s changing environment: Implications for Climate Change Resilience; REMA: Kigali, Rwanda; 2011.	none	N	Ramsar definition				Y
Rwanda Ministry of Natural Resources (MNR), Rwanda Environment Management Authority (REMA). Projet de gestion integree des ecosystemes critiques - Etablissement d'un inventaire national rapide des marrais et élaboration de 5 avant-projets d’arretés ministériels relatifs aux marais; 2008.	none	N	no definition				Y
Sakamoto, T.; Van Nguyen, N.; Kotera, A.; Ohno, H.; Ishitsuka, N.; Yokozawa, M. Detecting temporal changes in the extent of annual flooding within the Cambodia and the Vietnamese Mekong Delta from MODIS time-series imagery. Remote Sensing of Environment 2007, 109(3), 295-313.	none	N	no definition but delineation by surface properties (inundation)	DY			Y
Sakamoto, T.; Van Nguyen, N.; Ohno, H.; Ishitsuka, N.; Yokozawa, M. Spatio–temporal distribution of rice phenology and cropping systems in the Mekong Delta with special reference to the seasonal water flow of the Mekong and Bassac rivers. Remote Sensing of Environment 2006, 100(1), 1-16.	none	N	no definition				Y
Sakané, N.; Alvarez, M.; Becker, M.; Böhme, B.; Handa, C.; Kamiri, H.W.; Langensiepen, M.; Menz, G.; Misana, S.; Mogha, N.G.; Möseler, B.M.; Mwita, E.; Oyieke, H.A.; Van Wijk, M.T. Classification, Characterization and Use of small Wetlands in East Africa. Wetlands 2011, 31, 1103-1116.	SWEA “land units of less than 500 ha that are characterized by permanent or seasonal flooding or by soil moisture availability higher than that of the surrounding uplands”	N	SWEA definition				Y
Salvia, M.; Franco, M.; Grings, F.; Perna, P.; Martino, R.; Karszenbaum, R.; Ferrazzoli, P. Estimating Flow Resistance of Wetlands Using SAR Images and Interaction Models. Remote Sensing 2009, 1(4), 992-1008.	none	N	no definition				Y
Sang, H.; Zhang, J.; Lin, H.; Zhai, L. Multi-Polarization ASAR Backscattering from Herbaceous Wetlands in Poyang Lake Region, China. Remote Sensing 2014, 6(5), 4621-4646.	none	N	no definition				Y
Schmidt, K.S.; Skidmore, A.K. Spectral discrimination of vegetation types in a coastal wetland. Remote Sensing of Environment 2003, 85, 92-108.	none	N	no definition but delineation by surface properties (saltmarsh vegetation)	DX			Y
Schuyt, K.D. Economic consequences of wetland degradation for local populations in Africa. Ecological Economics 2005, 53(2), 177-190.	none	N	no definition				N
Shaikh, M.; Green, D.; Cross, H. A remote sensing approach to determine environmental flows for wetlands of the Lower Darling River, New South Wales, Australia. International Journal of Remote Sensing 2001, 22(9), 1737-1751.	none	N	no definition but delineation by surface properties (inundation)	DX			Y
Tanzania Ministry of Natural Resources and Tourism (MNR); Tanzania Wildlife Division; Tanzania Ministry of foreign Affairs; Danish International Development Agency (DanIDA). Sustainable Wetlands Management 2004-2009, Tanzania; n./A.: n./A., Tanzania, 2003.	none	N	Ramsar definition				Y
Tarnocai, C. Canadian Wetland Registry. In Proceedings of a Workshop on Canadian Wetlands, National Wetlands Working Groups meeting; Rubec, Pollett, Eds.; Environment Canada, Lands Directorate: Ottawa, Canada, 1980.	"'..land that is saturated with water long enough to promote wetland or aquatic process as indicated by poorly drained soils, hydrophytic vegetation and various kind of biologocal activity adapted to wet environment'"	N	distinct wetland definition	BY			N
Thamm, H.-P.; Menz, G.; Becker, M.; Kuria, D.-N.; Misana, S.; Kohn, D. The use of UAS for Assessing agricultural systems in an wetland in Tanzania in the dry- and wet-season for sustainable agriculture and providing ground truth for Terra-SAR X data. International Archives of the Photogrammetry, Remote Sensing and Spatial Information Sciences, Volume XL-1/W2 2013.	none	N	no definition				Y
The Nile Basin Initiative. Baseline for Wetlands and Biodiversity of Nile Basin Kenya; The Nile Basin Initiative Secretariat: Entebbe, Uganda, 2009.	Ramsar: “wetlands are areas of marsh, fen, peatland or water, whether natural or artificial, permanent of temporary, with water that is static or flowing, fresh, brackish or salt, including areas of marine water the depth of which at low tide does not exceed 6 metres."	N	Ramsar definition				N
Thenya, T. Challenges of conservation of dryland shallow waters, Ewaso Narok swamp, Laikipia District, Kenya. Hydrobiologia 2001, 458, 107-119.	none	N	no definition				N
Thieme, M.; Lehner, B.; Abell, R.; Hamilton, S.K.; Kellndorfer, J.; Powell, G.; Riveros, J.C. Freshwater conservation planning in data-poor areas: An example from a remote Amazonian basin (Madre de Dios River, Peru and Bolivia). Biological Conservation 2007, 135(4), 484-501.	none	N	no definition				Y
Thomas, R.F.; Kingsford, R.T.; Lu, Y.; Hunter, S.J. Landsat mapping of annual inundation (1979–2006) of the Macquarie Marshes in semi-arid Australia. International Journal of Remote Sensing 2011, 32(16), 4545-4569.	none	N	no definition but delineation by surface properties (historic flood boundary)	DX			Y
Torbick, N.; Becker, B. Evaluating Principal Components Analysis for Identifying Optimal Bands Using Wetland Hyperspectral Measurements From the Great Lakes, USA. Remote Sensing 2009, 1(3), 408-417.	none	N	no definition				Y
Torbick, N.; Persson, A.; Olefeldt, D.; Frolking, S.; Salas, W.; Hagen, S.; Crill, P.; Li, C. High Resolution Mapping of Peatland Hydroperiod at a High-Latitude Swedish Mire. Remote Sensing 2012, 4(7), 1974-1994.	none	N	no definition		mires		Y
Townsend, P.A. Estimating forest structure in wetlands using multitemporal SAR. Remote Sensing of Environment 2002, 79(2-3), 288-304.	none	N	no definition		floodplains		Y
Townsend, P.A. Relationships between forest structure and the detection of flood inundation in forested wetlands using C-band SAR. International Journal of Remote Sensing 2002, 23(3), 443-460.	none	N	no definition but delineation by surface properties (inundation)	DX			Y
Townsend, P.A.; Walsh, S.J. Modeling floodplain inundation using an integrated GIS with radar and optical remote sensing. Geomorphology 1998, 21(3-4), 295-312.	none	N	no definition but delineation by surface properties (inundation)	DX	floodplains		Y
Townsend, P.A.; Walsh, S.J. Remote sensing of forested wetlands: application of multitemporal and multispectral satellite imagery to determine plant community composition and structure in southeastern USA. Plant Ecology 2001, 157(2), 129-149.	none	N	no definition				Y
Töyrä, J.; Pietroniro, A. Towards operational monitoring of a northern wetland using geomatics-based techniques. Remote Sensing of Environment 2005, 97(2), 174-191.	none	N	no definition but delineation by surface properties (inundation)	DX			Y
Töyrä, J.; Pietroniro, A.; Martz, L.W. Multisensor Hydrologic Assessment of a Freshwater Wetland. Remote Sensing of Environment 2001, 75(2), 162-173.	none	N	no definition but delineation by surface properties (inundation)	DX			Y
Tulbure, M.G.; Broich, M. Spatiotemporal dynamic of surface water bodies using Landsat time-series data from 1999 to 2011. ISPRS Journal of Photogrammetry and Remote Sensing 2013, 79, 44-52.	none	N	no definition but delineation by surface properties (water body probability)	EX			Y
Uganda Ministry of Water, Lands and Environment. Uganda Wetlands Sector Strategic Plan 2001-2010; Uganda Ministry of Water, Lands and Environment: Kampala, Uganda, 2001.	none	N	no definition				N
UN Environment Programme (UNEP): Africa Water Atlas; UNEP: Nairobi, Kenya, 2010.	Ramsar: “wetlands are areas of marsh, fen, peatland or water, whether natural or artificial, permanent of temporary, with water that is static or flowing, fresh, brackish or salt, including areas of marine water the depth of which at low tide does not exceed 6 metres."	N	Ramsar definition				Y
UN Environment Programme (UNEP): Kenya Atlas of our changing Environment; UNEP: Nairobi, Kenya, 2009.	none	N	no definition				Y
UN-Water/ Africa; Economic Comission for Africa. African Water Development Report 2006; UN-Water: Addis Ababa, Ethiopia, 2006.	none	N	no definition				N
US Fish & Wildlife Service. The National Wetlands Inventory. http://www.fws.gov/wetlands/NWI/index.html (accessed on 24.4.2014).	US FWS (Cowardin_etal_1979): "lands transitional between terrestrial and aquatic systems where the water table is usually at or near the surface or the land is covered by shallow water"	N	US FWS definition				Y
Wang, L.; Dronova, I.; Gong, P.; Yang, W.; Li, Y.; Liu, Q. A new time series vegetation–water index of phenological–hydrological trait across species and functional types for Poyang Lake wetland ecosystem. Remote Sensing of Environment 2012, 125, 49-63.	none	N	no definition				Y
Wang, Y. Using Landsat 7 TM data acquired days after a flood event to delineate the maximum flood extent on a coastal floodplain. International Journal of Remote Sensing 2004, 25(5), 959-974.	none	N	no definition but delineation by surface properties (flood extent)	DX	floodplains		Y
Wang, Y.; Colby, J.D.; Mulcahy, K.A. An efficient method for mapping flood extent in a coastal floodplain using Landsat TM and DEM data. International Journal of Remote Sensing 2002, 23(18), 3681-3696.	none	N	no definition but delineation by surface properties (flood extent)	DX	floodplains		Y
Wang, Y.; Hess, L.L.; Filoso, S.; Melack, J M. Understanding the radar backscattering from flooded and nonflooded Amazonian forests: Results from canopy backscatter modeling. Remote Sensing of Environment 1995, 54(3), 324-332.	none	N	no definition but delineation by surface properties (flooded forest)	DY			Y
Wood, A.; Dixon, A.; McCartney, M. Wetlands Management and Sustainable Livelihoods in Africa; Routledge: New York, USA, 2013.	Ramsar: “wetlands are areas of marsh, fen, peatland or water, whether natural or artificial, permanent of temporary, with water that is static or flowing, fresh, brackish or salt, including areas of marine water the depth of which at low tide does not exceed 6 metres."	N	Ramsar definition				N
Wright, C.; Gallant, A. Improved Wetland remote sensing in Yellowstone National Park using classification trees to combine TM imagery and ancillary environmental data. Remote Sensing of Environment 2007, 107(4), 582-605.	US FWS (Cowardin_etal_1979): "lands transitional between terrestrial and aquatic systems where the water table is usually at or near the surface or the land is covered by shallow water"	N	US FWS definition				Y
Yadav, M.; Garg, J.K.; Areendran, G.; Raj, K. Assessment and Monitoring of Temporal Changes in Keoladeo National Park (A Wetland Ecosystem) and its catchment area. International Journal of Remote Sensing and GIS 2014, 3(1), 8-20.	Ramsar: “wetlands are areas of marsh, fen, peatland or water, whether natural or artificial, permanent of temporary, with water that is static or flowing, fresh, brackish or salt, including areas of marine water the depth of which at low tide does not exceed 6 meters."	N	Ramsar definition				Y
Yan, Y.; Zhao, B.; Chen, J.; Guo, H.; Gu, Y.; Wu, Q.; Li, B. Closing the carbon budget of estuarine wetlands with tower-based measurements and MODIS time series. Global Change Biology 2008, 14, 1690-1702.	"Estuarine wetlands are characterized by complex interactions between vegetation type, strong and frequent surface water movements (e.g. tides), and pore water movement (Hughes et al., 1998)."	N	distinct wetland definition	AX	estuarine wetlands		Y
Yan, Y.-E.; Ouyang, Z.-T.; Guo, H.-Q.; Jin, S.-S.; Zhao, B. Detecting the spatiotemporal changes of tidal flood in the estuarine wetland by using MODIS time series data. Journal of Hydrology 2010, 384(1-2), 156-163.	"The estuarine wetlands are a narrow ecological band between the marine, freshwater and land environment that are characterized by complex interactions among vegetation types, the intensities and frequencies of surface water movements (e.g.tide activity) and pore water movement."	N	distinct wetland definition	AX	estuarine wetlands		Y
Zhao, H.; Cui, B.; Zhang, H.; Fan, X.; Zhang, Z.; Lei, X. A landscape approach for wetland change detection (1979-2009) in the Pearl River Estuary. Procedia Environmental Sciences 2010, 2, 1265-1278.	"the main wetland types in study area were shallow marine water and irrigated land"	N	distinct wetland definition	EX			Y
Zhao, X.; Stein, A.; Chen, X.-L.; Monitoring the dynamics of wetland inundation by random sets on multi-temporal images. Remote Sensing of Environment 2011, 115(9), 2390-2401.	"A wetland is usually characterized by a dominance of wetland plants, soils subjects to waterlog and indicators of wetland water regime (Lyon, 2001)."	N	distinct wetland definition	BX			Y
Zlinszky, A.; Mücke, W.; Lehner, H.; Briese, C.; Pfeifer, N. Categorizing Wetland Vegetation by Airborne Laser Scanning on Lake Balaton and Kis-Balaton, Hungary. Remote Sensing 2012, 4(6), 1617-1650.	none	N	no definition but delineation by surface properties (vegetation stands)	DX			Y
Zoltai, S.C.; Pollett, F.C. Wetlands in Canada: their classification, distribution and use. In Mires: swamp, bog, fen and moor; Gore, Ed.; Elsevier: Amsterdam, Netherlands, 1983.	"Wetlands, as used in this chapter, are defined as areas where wet soils are prevalent, having a watertable near or above the mineral soil"	N	distinct wetland definition	BY			N
Zoltai, S.C.; Vitt, D.H. Canadian Wetlands: Environmental gradients and classification. Vegetatio 1995, 118, 131-137.	none	N	no definition	EY			N

## Sheet: pie charts
	Wetland in general	cases	in %		Wetland case studies	cases	in %	non remote sensing publication
	no def	26	27.3684		no def	65	43.3333	13
	no def but disc	11	11.5789		no def but disc	4	2.66667	2
	no def but del	6	6.31579		no def but del	25	16.6667	1
	ramsar def	18	18.9474		ramsar def	13	8.66667	4
	us fws def	6	6.31579		us fws def	6	4	0
	definition	28	29.4737		swea def	3	2	0
	sum	95	100		definition	34	22.6667	8
					sum	150	100	28
